# Supplementary material
Source: PubMed Central journal article supplement (PMC7255892)
Supplement: EMS86189-supplement-Supplementary_tables_and_figure.pdf [file EMS86189-supplement-Supplementary_tables_and_figure.pdf]

1

|                                    | p53 +ve (%) | Aneuploidy +ve (%) | cyclinA +ve (%) | p16.meth +ve (%) | G2 +ve (%) | hpp1 +ve (%) | runx3 +ve (%) | p53.loh +ve (%) | p16.loh +ve (%) |
|------------------------------------|-------------|--------------------|-----------------|------------------|------------|--------------|---------------|-----------------|-----------------|
| <b>NDBO (non-progressors) n=74</b> | 14 (18.9)   | 3 (4.1)            | 15 (20.3)       | 27 (36.5)        | 25 (33.8)  | 61 (82.4)    | 35 (47.3)     | 23 (31.1)       | 52 (70.3)       |
| <b>NDBO (progressors) n=24</b>     | 8 (33.3)    | 7 (29.2)           | 4 (16.7)        | 10 (41.7)        | 11 (45.8)  | 20 (83.3)    | 17 (70.8)     | 8 (33.3)        | 13 (54.2)       |
| <b>ID (non-progressors) n=6</b>    | 4 (66.7)    | 2 (33.3)           | 3 (50.0)        | 5 (83.3)         | 2 (33.3)   | 6 (100.0)    | 6 (100.0)     | 1 (16.7)        | 6 (100.0)       |
| <b>ID (progressors) n=4</b>        | 2 (50.0)    | 0 (0.0)            | 0 (0.0)         | 2 (50.0)         | 2 (50.0)   | 4 (100.0)    | 3 (75.0)      | 1 (25.0)        | 2 (50.0)        |
| <b>LGD (non-progressors) n=5</b>   | 0 (0.0)     | 0 (0.0)            | 1 (20.0)        | 2 (40.0)         | 0 (0.0)    | 5 (100.0)    | 1 (20.0)      | 2 (40.0)        | 2 (40.0)        |
| <b>LGD (progressors) n=14</b>      | 10 (71.5)   | 5 (35.7)           | 8 (57.1)        | 9 (64.3)         | 12 (85.7)  | 14 (100.0)   | 13 (92.9)     | 4 (28.6)        | 10 (71.4)       |

**Supplementary Table 1.** Biomarker status according to baseline histology group.

2  
3  
4  
5  
6  
7  
8  
9  
10  
11  
12  
13  
14  
15  
16  
17  
18  
19  
20  
21  
22  
23

1

|                       | <b>Coefficient</b> | <b>Standard Error</b> | <b>P-value</b> |
|-----------------------|--------------------|-----------------------|----------------|
| <b>Intercept</b>      | 0.23               | 0.048                 | 0.000004       |
| <b>p53 +ve</b>        | 0.19               | 0.089                 | 0.037          |
| <b>Aneuploidy +ve</b> | 0.39               | 0.126                 | 0.002          |

2

3

**Supplementary Table 2.** Logistic regression coefficients and p-values of p53 and aneuploidy for predicting any progression.

4

5

6

7

8

9

10

11

12

13

14

15

16

17

18

19

20

21

22

23

24

25

26

27

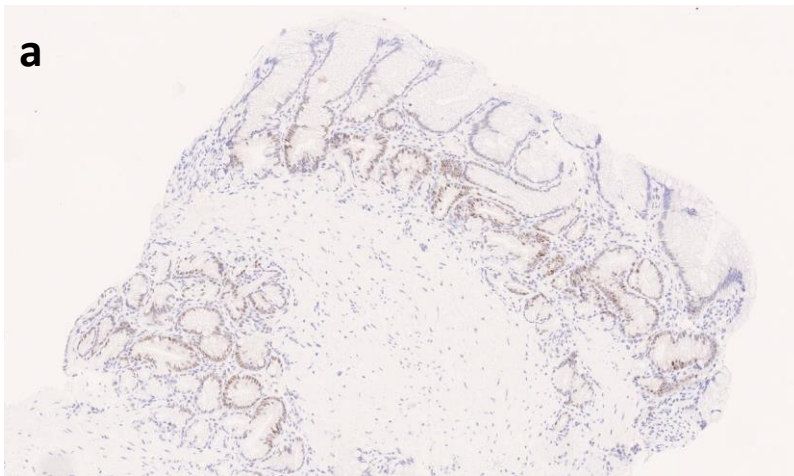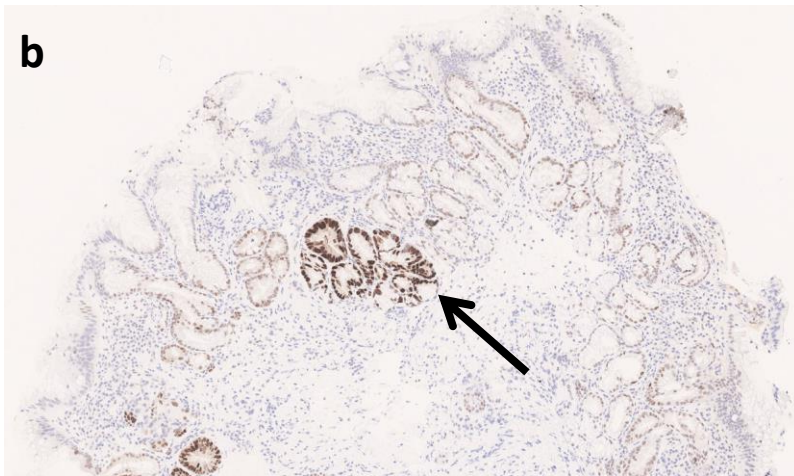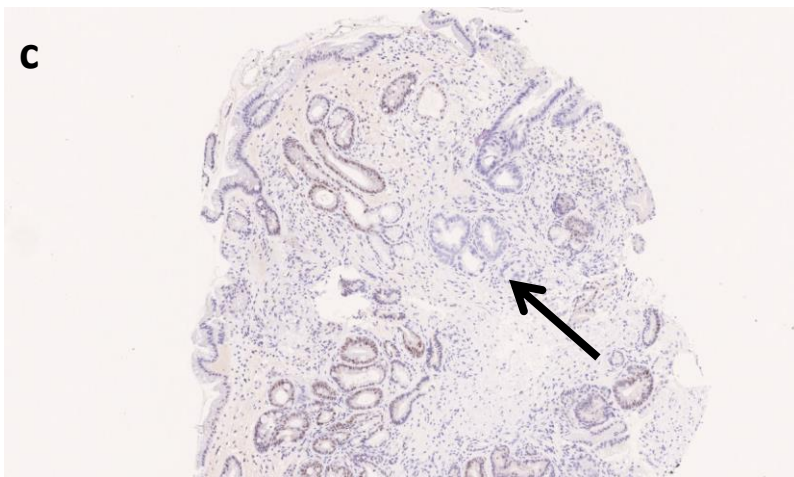

1  
2  
3  
4  
5  
6  
7  
8  
9

**Supplementary Figure 1. Patterns of p53 staining in Barrett's oesophagus.**

a. Normal pattern of nuclear staining; b. Aberrant pattern with focal protein over-expression (arrow) in a case with basal crypt low-grade dysplasia surrounded by normal background staining; c. Aberrant pattern with focal loss of p53 staining (arrow) surrounded by normal background staining in a case with low-grade dysplasia.
